# Supplementary material for: Macro-Morphological and Ecological Variation in Rosa sericea Complex
Source: MDPI journal article supplement (doi:10.3390/agronomy12051078), 2022-04-29
Supplement: s1 [file s1]

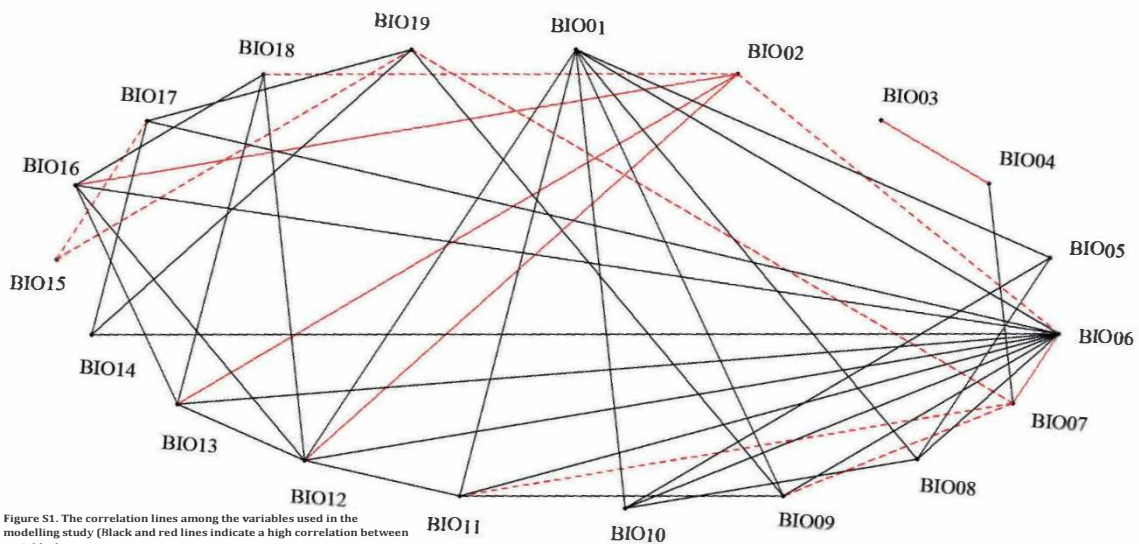

Figure S1. The correlation lines among the variables used in the modelling study (Black and red lines indicate a high correlation between variables).
