# Supplementary figures and images for: Macro-Morphological and Ecological Variation in Rosa sericea Complex
Source: MDPI journal article supplement (doi:10.3390/agronomy12051078), 2022-04-29

**Figure S2.** The most limiting variables of the species complex distribution in China.

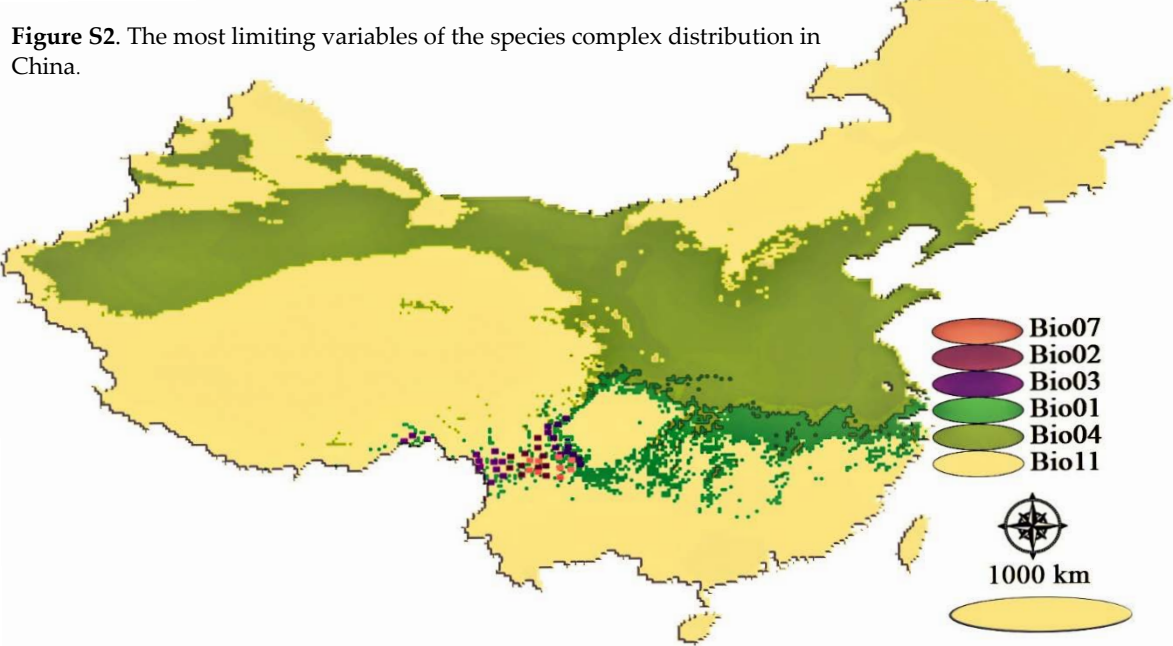

Supplement: s1 [file s1]
